# Supplementary material for: Differential Expression of NEK Kinase Family Members in Esophageal Adenocarcinoma and Barrett’s Esophagus
Source: MDPI journal article supplement (doi:10.3390/cancers15194821), 2023-09-30
Supplement: s1 [file s1]

**Table S1. Primer sequences for NEKs qRT-PCR**

| <b>Primer Name</b> | <b>Sequence (5'-3')</b>       |
|--------------------|-------------------------------|
| NEK1 RT-F          | TCA CCA CGA AGT TTG GCT TT    |
| NEK1 RT-R          | GAA AAC GGG AAG CTA TGC AG    |
| NEK2 RT-F          | GGA GGG GAT CTG GCT AGT GT    |
| NEK2 RT-R          | CAC CAT CAC TTC GTC TGT GG    |
| NEK3 RT-F          | CAG TCC ACT GCC GTC TCA TT    |
| NEK3 RT-R          | GGG GGT AAG CAC TTC TGG AC    |
| NEK4 RT-F          | TCT TTT GGA GGA GGA TG        |
| NEK4 RT-R          | AAC TGG CGA GCT TTC ACA CT    |
| NEK5 RT-F          | TCA GCA AAC ATC CTC AGC GT    |
| NEK5 RT-R          | CTC TTT CAC CTG GGG CTC TG    |
| NEK6 RT-F          | GTG AAG CTC GGT GAC CTT G     |
| NEK6 RT-R          | CCG TTC TCA TGG ATC CTC TC    |
| NEK7 RT-F          | TCT TAA GCA ACT CAA CCA TCC A |
| NEK7 RT-R          | GGA TAG GTC GCC AGC ATC TG    |
| NEK8 RT-F          | ATG GAG AAG TAC GAG CGG AT    |
| NEK8 RT-R          | TCA CCA GCT TCT GGT CAG C     |
| NEK9 RT-F          | CCA TCC GTT CCA ATA GCA GT    |
| NEK9 RT-R          | TGT CCT CTT CTT CAC CAC CG    |
| NEK10 RT-F         | TGC GAT GTT AAT TCT GGG GCA   |
| NEK10 RT-R         | GAC GTT CAA AAG GCA CCG AA    |
| NEK11 RT-F         | CAA GAA AGC CAA ACG AGG AG    |
| NEK11 RT-R         | AGA GGA GTT GGG CTT CCA AA    |

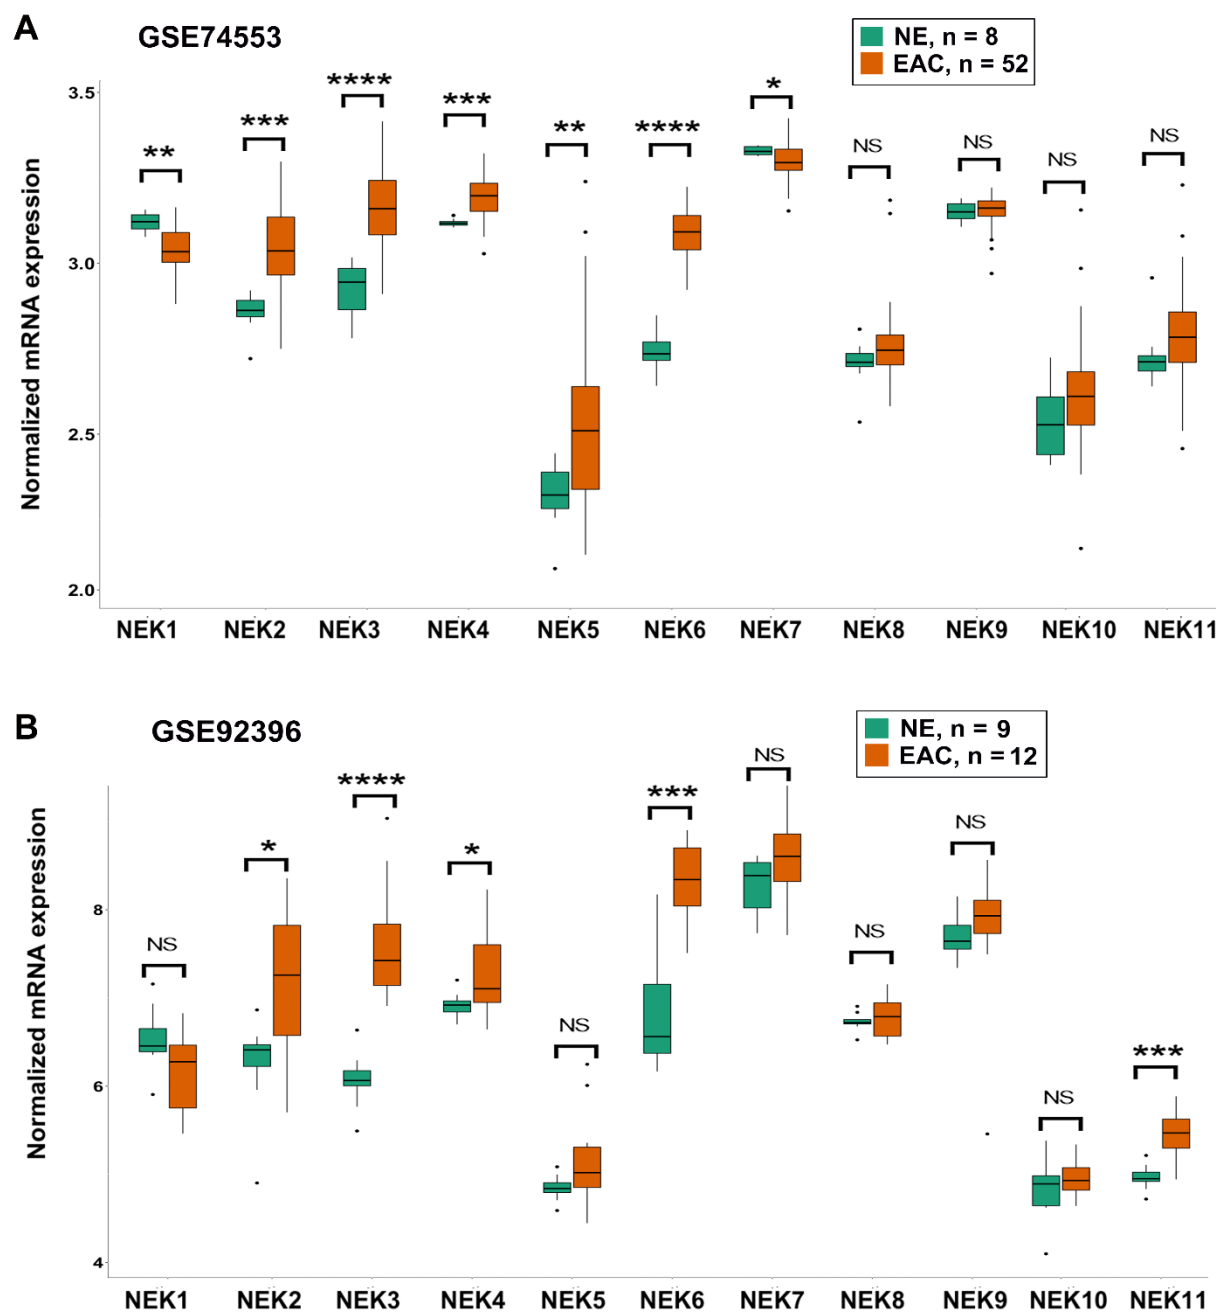

**Figure S1. Bioinformatics analyses of NEKs gene expression in normal esophagus (BE) and esophageal adenocarcinoma (EAC).** GEO datasets GSE74553 (A) and GSE92396 (B) which contain gene expression from normal esophagus and adenocarcinoma samples were analyzed as described in the Methods section. NEKs expressions were presented as normalized values based on original dataset's normalization. \*,  $P < 0.05$ ; \*\*,  $P < 0.01$ ; \*\*\*,  $P < 0.001$ , NS, not significance.

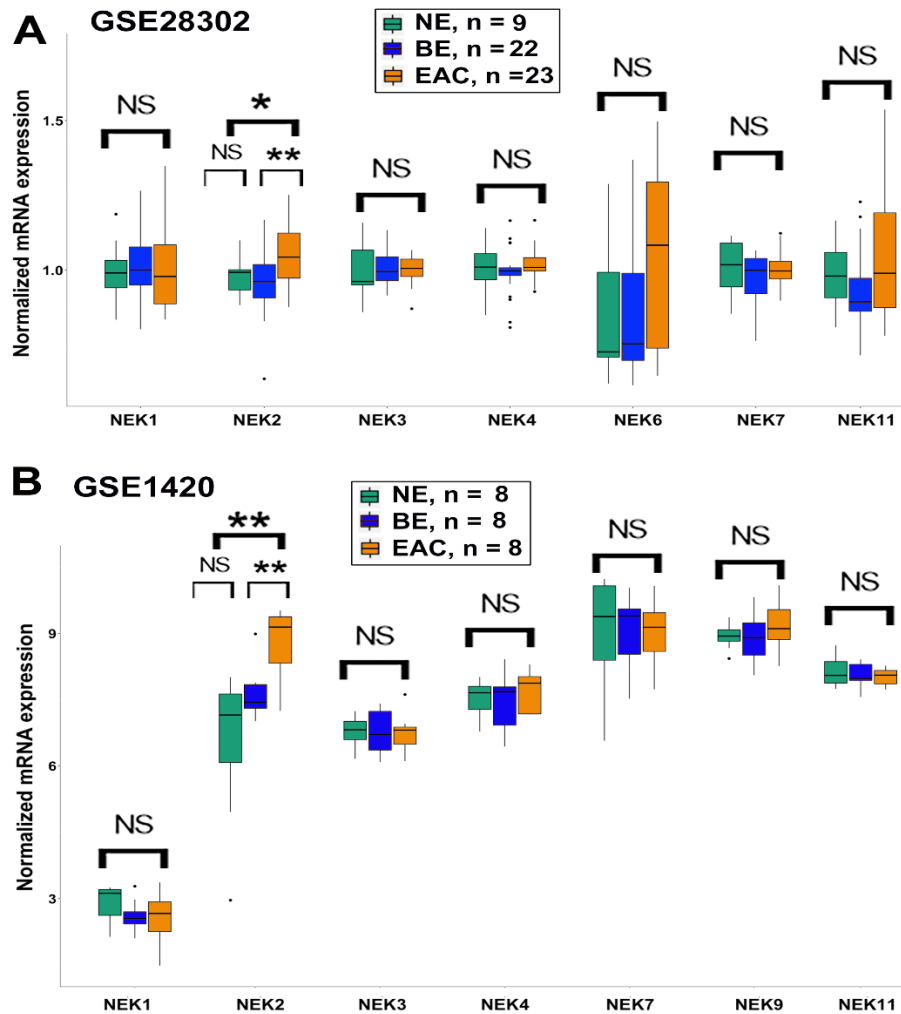

**Figure S2. Bioinformatics analyses of NEKs gene expression in normal esophagus (NE), Barrett's esophagus (BE)s and esophageal adenocarcinoma (EAC).** GEO datasets GSE28302 (A) and GSE1420 (B) which contains gene expression from normal esophagus, Barrett's esophagus and adenocarcinoma samples were analyzed as described in the Methods section. NEKs expressions were presented as normalized values based on original dataset's normalization. \*,  $P < 0.05$ ; \*\*,  $P < 0.01$ ; NS, not significance.

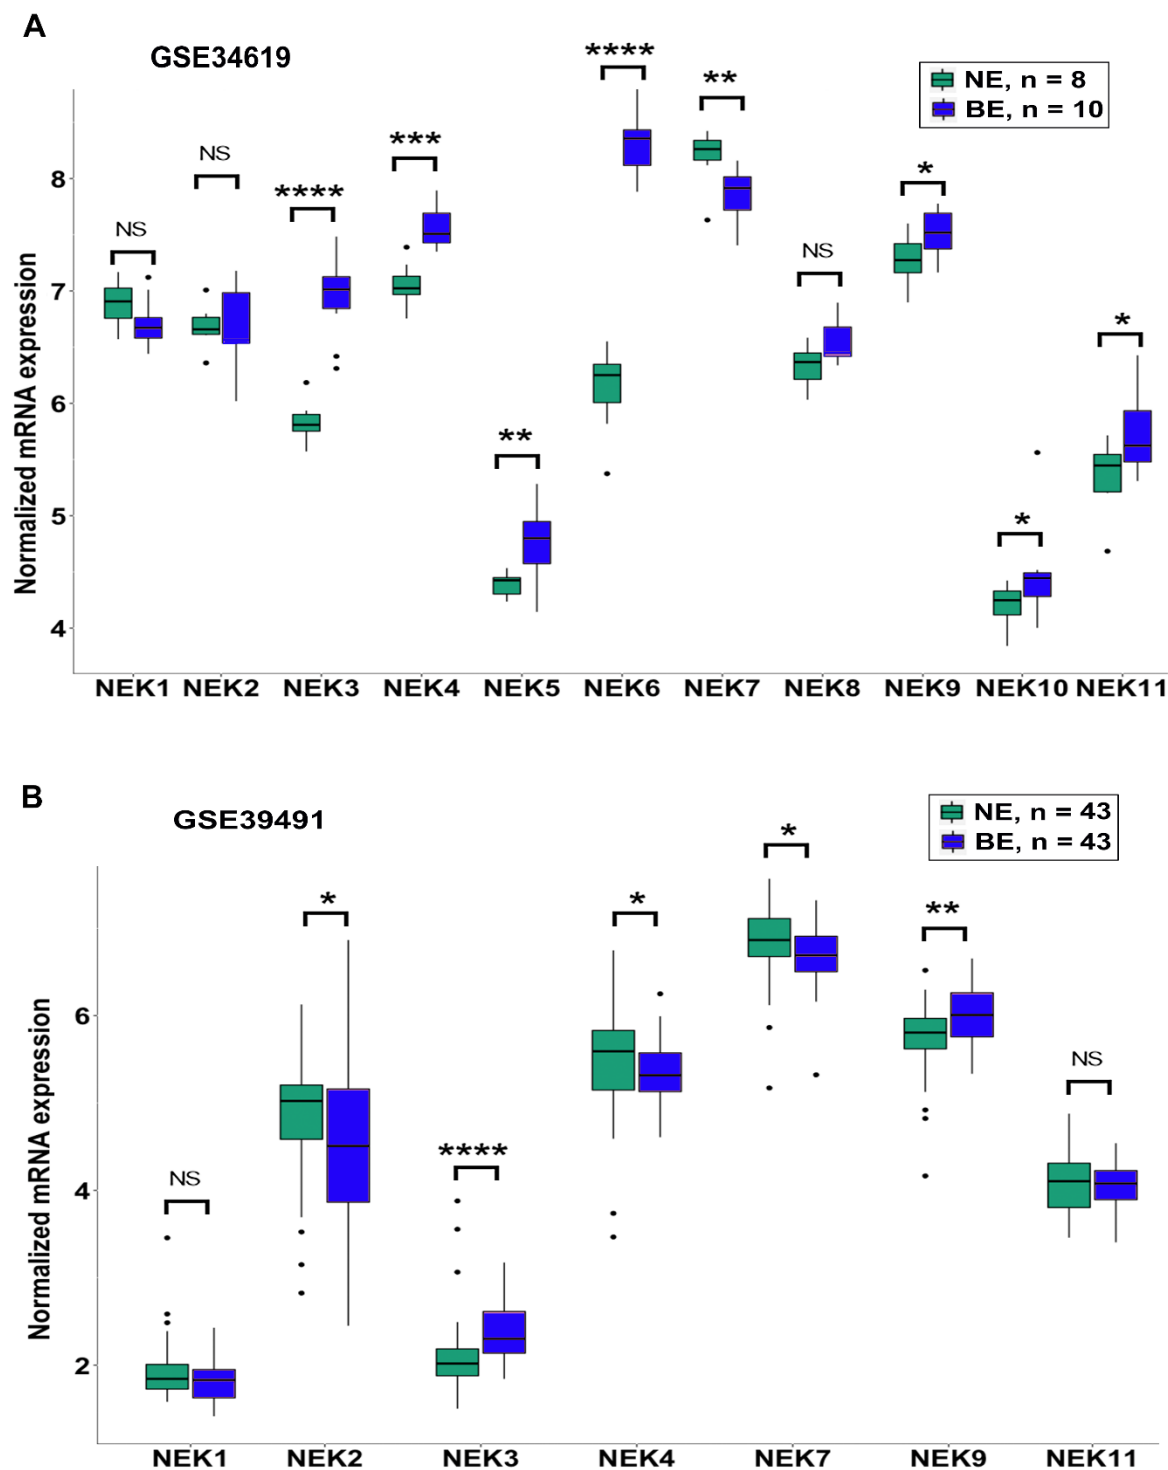

**Figure S3. Bioinformatics analyses of NEKs gene expression in normal esophagus (NE) and Barrett's esophagus (BE).** GEO datasets GSE34619 (A) and GSE39491 (B) which contains gene expression from normal esophagus and Barrett's esophagus samples were analyzed as described in Methods section. NEKs expressions were presented as normalized values based on original dataset's normalization. \*,  $P < 0.05$ ; \*\*,  $P < 0.01$ ; \*\*\*,  $P < 0.001$ ; \*\*\*\*,  $P < 0.0001$ ; NS, not significance.
