# Supplementary figures and images for: Differential Expression of NEK Kinase Family Members in Esophageal Adenocarcinoma and Barrett’s Esophagus
Source: MDPI journal article supplement (doi:10.3390/cancers15194821), 2023-09-30

## For Cancers

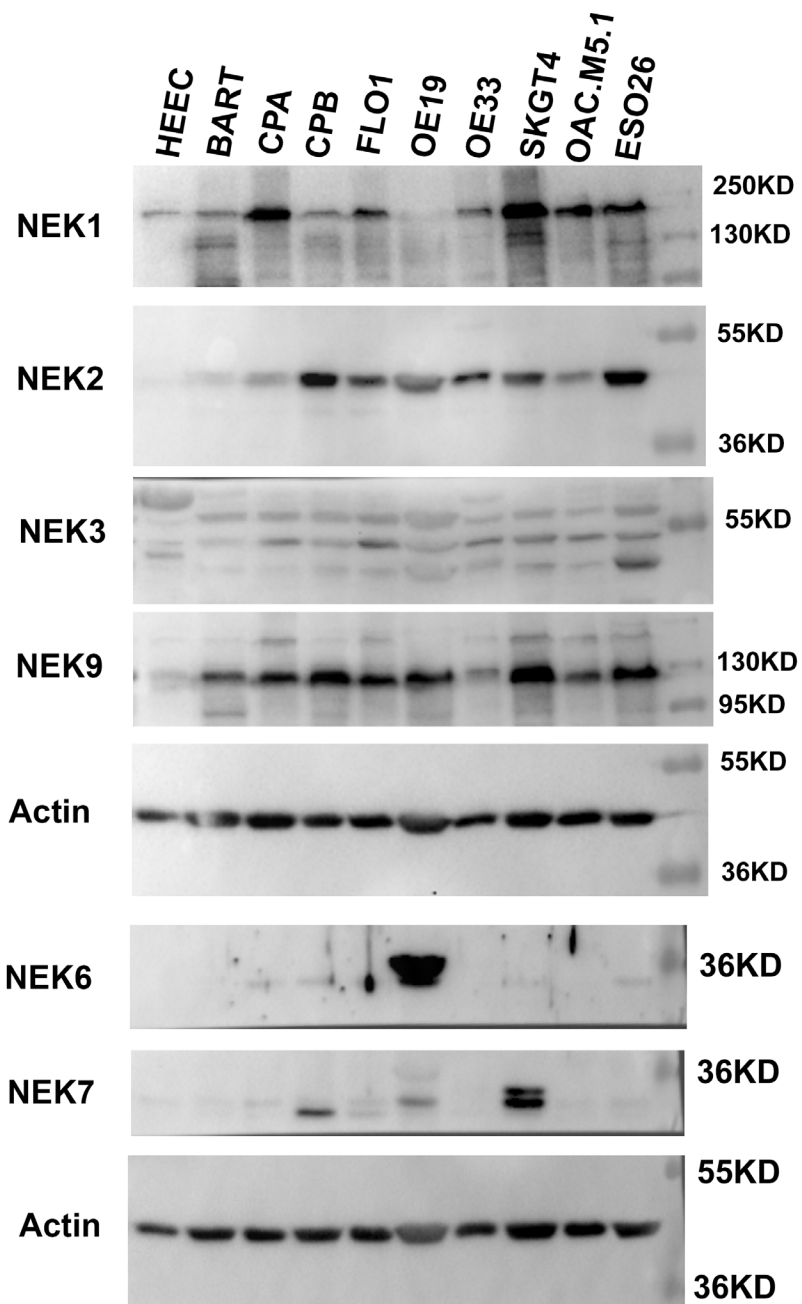

Supplement: s1 [file s1]
